# Supplementary material for: Scientific Validation of Ethnomedicinal Use ofIpomoea batatasL. Lam. as Aphrodisiac and Gonadoprotective Agent against Bisphenol A Induced Testicular Toxicity in Male Sprague Dawley Rats
Source: Hindawi journal article supplement (doi:10.1155/2019/8939854), 2019-04-14
Supplement: f1 [file 8939854.f1.pdf]

## Additional files

### Additional file 1

**Table 1.** Phytochemical analysis of *I. batatas*

| Phytochemical        | IPT-EA | IPT-M | IPA-EA | IPA-M |
|----------------------|--------|-------|--------|-------|
| <b>Phenols</b>       | +++    | ++    | +++    | ++    |
| <b>Flavonoids</b>    | +++    | ++    | +++    | ++    |
| <b>Coumarins</b>     | +      | +     | +      | ++    |
| <b>Saponins</b>      | +      | ++    | +      | +     |
| <b>Terpenoids</b>    | ++     | +     | ++     | -     |
| <b>Triterpenoids</b> | ++     | -     | +++    | +     |
| <b>Tannins</b>       | +      | ++    | ++     | ++    |
| <b>Quinones</b>      | -      | -     | -      | -     |
| <b>Anthocyanin</b>   | ++     | ++    | +++    | ++    |
| <b>Betacyanin</b>    | -      | -     | ++     | +     |

(+) present, (-) absent, (++) moderate concentration, (+++) abundant concentration. IPA-EA. *I. batatas* aerial-ethyl acetate extracts, IPA-M *I. batatas* aerial-methanol extract, IPT-EA. *I. batatas* tuber-ethyl acetate extract, IPT-M. *I. batatas* tuber-methanol extract.

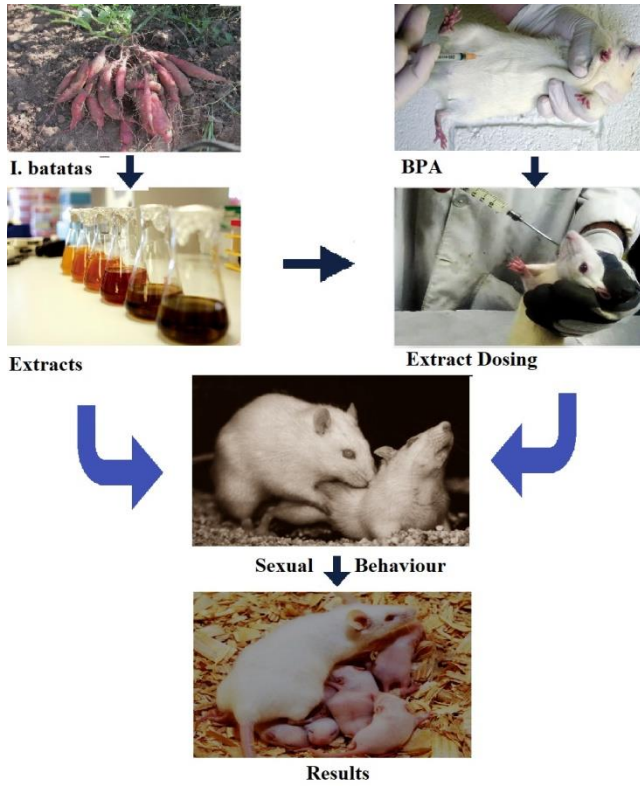

Graphical demonstration of aphrodisiac and gonadoprotective potential of *Ipomoea batatas* against BPA induced testicular damage
